# Supplementary material for: Carrier protein substrates in cytochrome P450-catalysed oxidation
Source: Royal Society of Chemistry journal article supplement (doi:10.1039/c0mt00081g), 2011-01-01
Supplement: c0mt00081g.pdf [file c0mt00081g.pdf]

## Supplementary Information for

# Carrier Protein Substrates in Cytochrome P450-Catalysed Oxidation

Max J. Cryle\*

**Supplementary Table 1.** Carrier protein/P450 systems characterised to date

| Cytochrome P450 |          | Organism                                   | Operon / Cluster           | % ID             | Substrate      | Function                            | Characterisation           |                                    | References |
|-----------------|----------|--------------------------------------------|----------------------------|------------------|----------------|-------------------------------------|----------------------------|------------------------------------|------------|
| Name            | CYP      |                                            |                            |                  |                |                                     | Structural                 | Biochemical                        |            |
| BioI            | CYP107H1 | <i>Bacillus subtilis</i>                   | Biotin Operon              |                  | Acyl-ACP       | Carbon-carbon bond cleavage         | Complex (3EJB, 3EJD, 3EJE) | Substrate Binding/Oxidation        | 1          |
| CalO2           | CYP248A1 | <i>Micromonospora echinospora</i>          | Calichemeicin Biosynthesis |                  | Orsellinyl-ACP | Aromatic hydroxylation              | Apo (3BUJ)                 | Substrate Binding                  | 2          |
| OxyD            | CYP146   | <i>Amycolatopsis balhimycina</i> DSM5908   | Balhimycin Biosynthesis    |                  | Tyrosyl-PCP    | Amino acid $\beta$ -hydroxylation   | Apo (3MGX)                 | Substrate Binding                  | 3          |
| NovI            | CYP163A1 | <i>Streptomyces sphaeroides</i> ATCC26935  | Novobiocin Biosynthesis    |                  | Tyrosyl-PCP    | Amino acid $\beta$ -hydroxylation   |                            | Substrate Oxidation                | 4          |
| NikQ            | CYP162A1 | <i>Streptomyces tendae</i> Tü901 ATCC31160 | Nikkomycin X Biosynthesis  |                  | Histidinyl-PCP | Amino acid $\beta$ -hydroxylation   |                            | Substrate Oxidation                | 5          |
| OxyA            | CYP165A1 | <i>A. balhimycina</i> DSM5908              | Balhimycin Biosynthesis    | a                | Peptidyl-PCP   | Phenolic cross linking residues 2-4 |                            | <i>In vivo</i> metabolite analysis | 6          |
| OxyB            | CYP165B1 | <i>A. balhimycina</i> DSM5908              | Balhimycin Biosynthesis    | b                | Peptidyl-PCP   | Phenolic cross linking residues 4-6 |                            | <i>In vivo</i> metabolite analysis | 6          |
| OxyC            | CYP165C1 | <i>A. balhimycina</i> DSM5908              | Balhimycin Biosynthesis    | c                | Peptidyl-PCP   | Aryl cross linking residues 5-7     |                            | <i>In vivo</i> metabolite analysis | 6          |
| OxyB            | CYP165B3 | <i>Amycolatopsis orientalis</i> DSM40040   | Vancomycin Biosynthesis    | 87% <sup>b</sup> | Peptidyl-PCP   | Phenolic cross linking residues 4-6 | Apo (1LFK, 1LG9, 1LGF)     | Substrate Binding/Oxidation        | 7          |

|       |          |                                                     |                             |                  |                  |                                           |            |                                       |               |
|-------|----------|-----------------------------------------------------|-----------------------------|------------------|------------------|-------------------------------------------|------------|---------------------------------------|---------------|
| OxyC  | CYP165C4 | <i>A. orientalis</i><br>DSM40040                    | Vancomycin<br>Biosynthesis  | 88% <sup>c</sup> | Peptidyl-<br>PCP | Aryl cross<br>linking residues<br>5-7     | Apo (1UED) |                                       | 8             |
| StaF  | CYP165A4 | <i>Streptomyces<br/>toyocaensis</i><br>NRRL15009    | A47934<br>Biosynthesis      | 72% <sup>a</sup> | Peptidyl-<br>PCP | Phenolic cross<br>linking residues<br>2-4 |            | <i>In vivo</i> metabolite<br>analysis | 9             |
| StaG  | CYP165D1 | <i>S. toyocaensis</i><br>NRRL15009                  | A47934<br>Biosynthesis      | <sup>d</sup>     | Peptidyl-<br>PCP | Phenolic cross<br>linking residues<br>1-3 |            | <i>In vivo</i> metabolite<br>analysis | 9             |
| StaH  | CYP165B4 | <i>S. toyocaensis</i><br>NRRL15009                  | A47934<br>Biosynthesis      | 77% <sup>b</sup> | Peptidyl-<br>PCP | Phenolic cross<br>linking residues<br>4-6 |            | <i>In vivo</i> metabolite<br>analysis | 9             |
| StaJ  | CYP165C5 | <i>S. toyocaensis</i><br>NRRL15009                  | A47934<br>Biosynthesis      | 49% <sup>c</sup> | Peptidyl-<br>PCP | Aryl cross<br>linking residues<br>5-7     |            | <i>In vivo</i> metabolite<br>analysis | 9             |
| Tcp18 | CYP165D3 | <i>Actinoplanes<br/>teichomyceticus</i><br>DSM43866 | Teicoplanin<br>Biosynthesis | 80% <sup>d</sup> | Peptidyl-<br>PCP | Phenolic cross<br>linking residues<br>1-3 | Apo (3O1A) | Substrate Binding                     | <sup>10</sup> |

## References

1. J. E. Stok, J. J. De Voss, *Arch. Biochem. Biophys.* 2000, *384*. 351-360; R. J. Lawson, D. Leys, M. J. Sutcliffe, C. A. Kemp, M. R. Cheesman, S. J. Smith, J. Clarkson, W. E. Smith, I. Haq, J. B. Perkins, A. W. Munro, *Biochemistry* 2004, *43*. 12410-12426; A. J. Green, S. L. Rivers, M. Cheesman, G. A. Reid, L. G. Quaroni, I. D. G. Macdonald, S. K. Chapman, A. W. Munro, *J. Biol. Inorg. Chem.* 2001, *6*. 523-533; M. J. Cryle, I. Schlichting, *Proc. Natl. Acad. Sci. USA* 2008, *105*. 15696-15701; M. J. Cryle, J. J. De Voss, *Chem. Commun.* 2004. 86-87; M. J. Cryle, N. J. Matovic, J. J. De Voss, *Org. Lett.* 2003, *5*. 3341-3344.
2. G. M. Jason, D. J. Heather, S. Shanteri, A. B. Craig, L. In-Kyoung, S. T. Jon, N. P. George, Jr., *Proteins: Struct., Funct., Bioinf.* 2009, *74*. 50-60.
3. M. J. Cryle, A. Meinhart, I. Schlichting, *J. Biol. Chem.* 2010, *285*. 24562-24574; O. Puk, D. Bischoff, C. Kittel, S. Pelzer, S. Weist, E. Stegmann, R. D. Suessmuth, W. Wohlleben, *J. Bacteriol.* 2004, *186*. 6093-6100.
4. H. Chen, C. T. Walsh, *Chem. Biol.* 2001, *8*. 301-312.
5. H. Chen, B. K. Hubbard, S. E. O'Connor, C. T. Walsh, *Chem. Biol.* 2002, *9*. 103-112.
6. E. Stegmann, S. Pelzer, D. Bischoff, O. Puk, S. Stockert, D. Butz, K. Zerbe, J. Robinson, R. D. Suessmuth, W. Wohlleben, *J. Biotech.* 2006, *124*. 640-653; D. Bischoff, B. Bister, M. Bertazzo, V. Pfeifer, E. Stegmann, G. J. Nicholson, S. Keller, S. Pelzer, W. Wohlleben, R. D. Suessmuth, *ChemBioChem* 2005, *6*. 267-272; D. Bischoff, S. Pelzer, B. Bister, G. J. Nicholson, S. Stockert, M. Schirle, W. Wohlleben, G. Jung, R. D. Sussmuth, *Angew. Chem., Int. Ed.* 2001, *40*. 4688-4691.

7. K. Woithe, N. Geib, O. Meyer, T. Wörtz, K. Zerbe, J. A. Robinson, *Org. Biomol. Chem.* 2008, 6. 2861-2867; N. Geib, K. Woithe, K. Zerbe, D. B. Li, J. A. Robinson, *Bioorg. Med. Chem. Lett.* 2008, 18. 3081-3084; K. Woithe, N. Geib, K. Zerbe, D. B. Li, M. Heck, S. Fournier-Rousset, O. Meyer, F. Vitali, N. Matoba, K. Abou-Hadeed, J. A. Robinson, *J. Am. Chem. Soc.* 2007, 129. 6887-6895; K. Zerbe, K. Woithe, D. B. Li, F. Vitali, L. Bigler, J. A. Robinson, *Angew. Chem., Int. Ed.* 2004, 43. 6709-6713; K. Zerbe, O. Pylypenko, F. Vitali, W. Zhang, S. Rousset, M. Heck, J. W. Vrijbloed, D. Bischoff, B. Bister, R. D. Sussmuth, S. Pelzer, W. Wohlleben, J. A. Robinson, I. Schlichting, *J. Biol. Chem.* 2002, 277. 47476-47485.
8. O. Pylypenko, F. Vitali, K. Zerbe, J. A. Robinson, I. Schlichting, *J. Biol. Chem.* 2003, 278. 46727-46733.
9. B. Hadatsch, D. Butz, T. Schmiederer, J. Steudle, W. Wohlleben, R. Suessmuth, E. Stegmann, *Chem. Biol.* 2007, 14. 1078-1089.
10. M. J. Cryle, J. Staaden, I. Schlichting, *Arch. Biochem. Biophys.* In Press, Corrected Proof. doi:10.1016/j.abb.2010.10.017.
